# Supplementary material for: Highly Selective Electrochemical CO2 Reduction to C2 Products on a g-C3N4-Supported Copper-Based Catalyst
Source: MDPI journal article supplement (doi:10.3390/ijms232214381), 2022-11-19
Supplement: s1 [file s1]

## Supplementary Information

# Highly Selective Electrochemical CO<sub>2</sub> Reduction to C<sub>2</sub> Products on a g-C<sub>3</sub>N<sub>4</sub>-Supported Copper-Based Catalyst

Zijun Yan <sup>1</sup> and Tao Wu <sup>1,2,3,\*</sup>

<sup>1</sup> New Materials Institute, University of Nottingham Ningbo China, Ningbo 315100, China

<sup>2</sup> Key Laboratory of Carbonaceous Wastes Processing and Process Intensification of Zhejiang Province, University of Nottingham Ningbo China, Ningbo 315100, China

<sup>3</sup> Nottingham Ningbo Beacons of Excellence Research and Innovation Institute, Ningbo 315000, China

\* Correspondence: tao.wu@nottingham.edu.cn

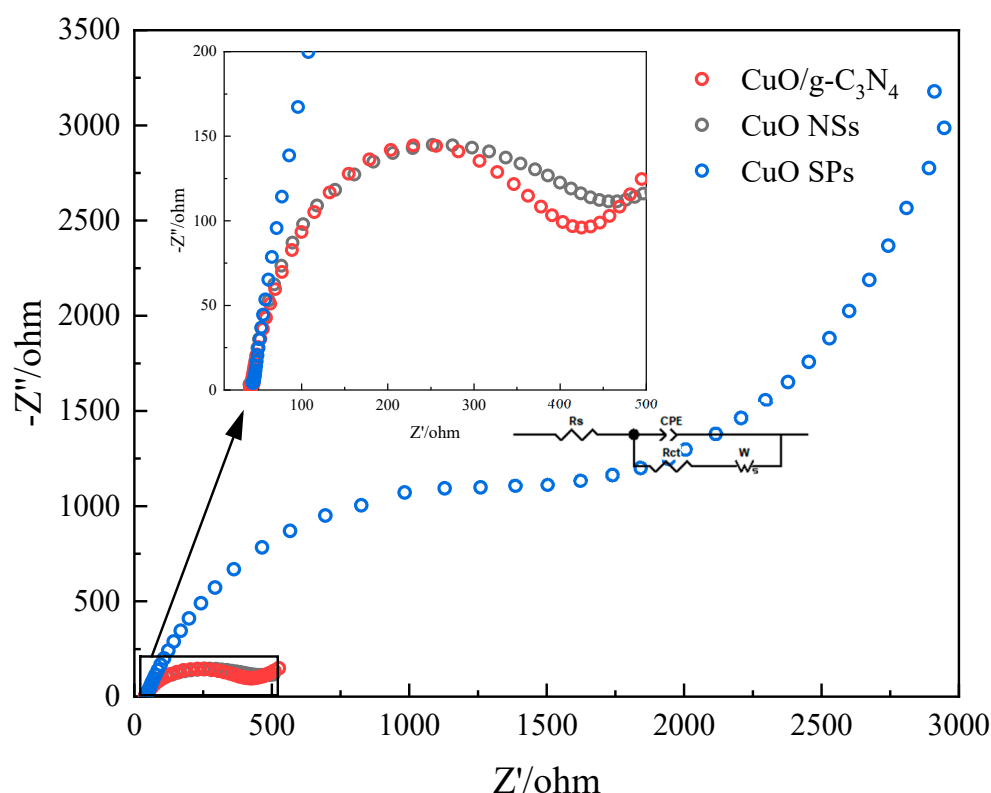

**Figure S1.** EIS spectra of CuO SPs, CuO NSs and CuO/g-C<sub>3</sub>N<sub>4</sub> in CO<sub>2</sub>-saturated KHCO<sub>3</sub> solution. The enlarged Nyquist plots for the high frequency region and Randel's equivalent circuit model are displayed in the inset.

**Table S1.** Parameters of EIS equivalent circuit of CuO SPs, CuO NSs and CuO/g-C<sub>3</sub>N<sub>4</sub>.

| Electrode                           | $R_s/(\text{ohm})$ | $R_{ct}/(\text{ohm})$ | $W/(S*s^{0.5})$ | $CPE/(S*s^a)$   | a      |
|-------------------------------------|--------------------|-----------------------|-----------------|-----------------|--------|
| CuO/g-C <sub>3</sub> N <sub>4</sub> | 40.65              | 361.8                 | $6.539*10^{-3}$ | $101.0*10^{-6}$ | 0.8251 |
| CuO NSs                             | 45.89              | 702.5                 | $1.169*10^{-3}$ | $70.96*10^{-6}$ | 0.8445 |
| CuO SPs                             | 43.45              | 1722                  | $0.296*10^{-3}$ | $8.731*10^{-6}$ | 0.8547 |

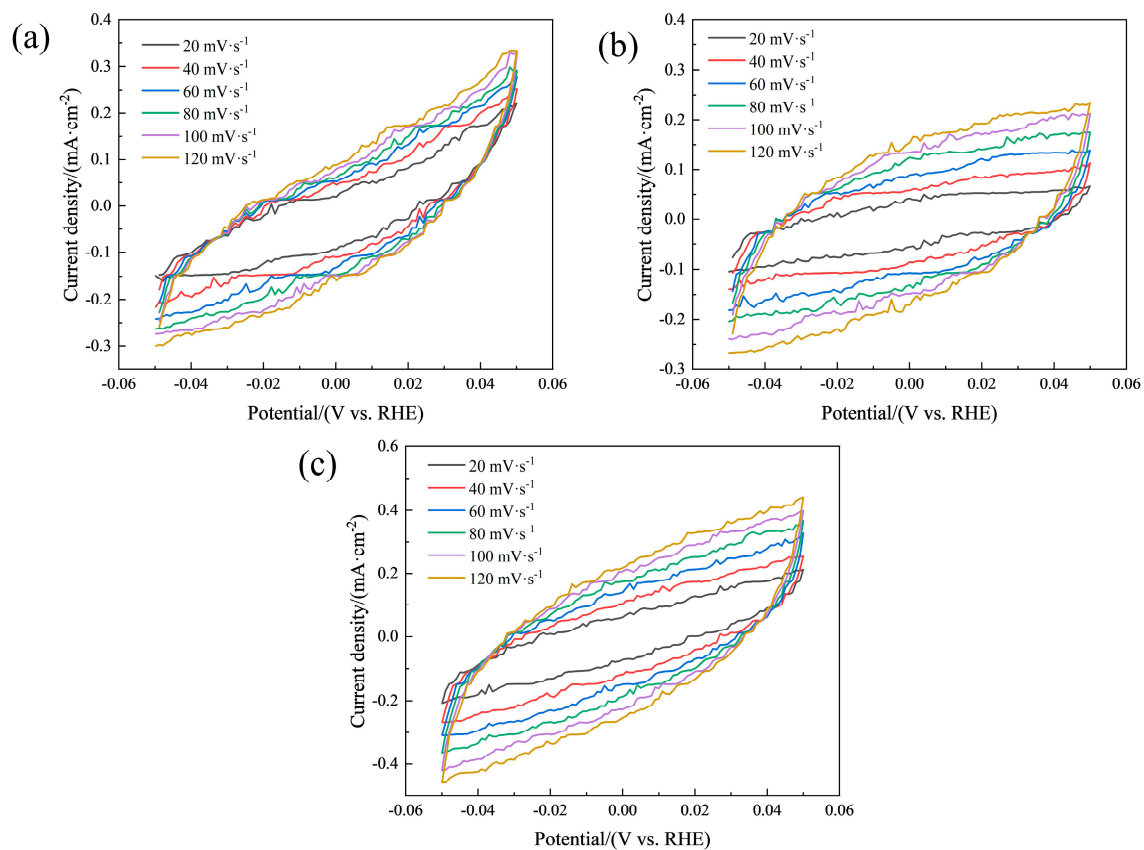

**Figure S2.** CVs of (a) CuO SPs, (b) CuO NSs and (c) CuO/g-C<sub>3</sub>N<sub>4</sub> electrodes at different scan rates (20 ~ 120 mV·s<sup>-1</sup>) in the potential range of -0.05 ~ 0.05V vs. RHE.

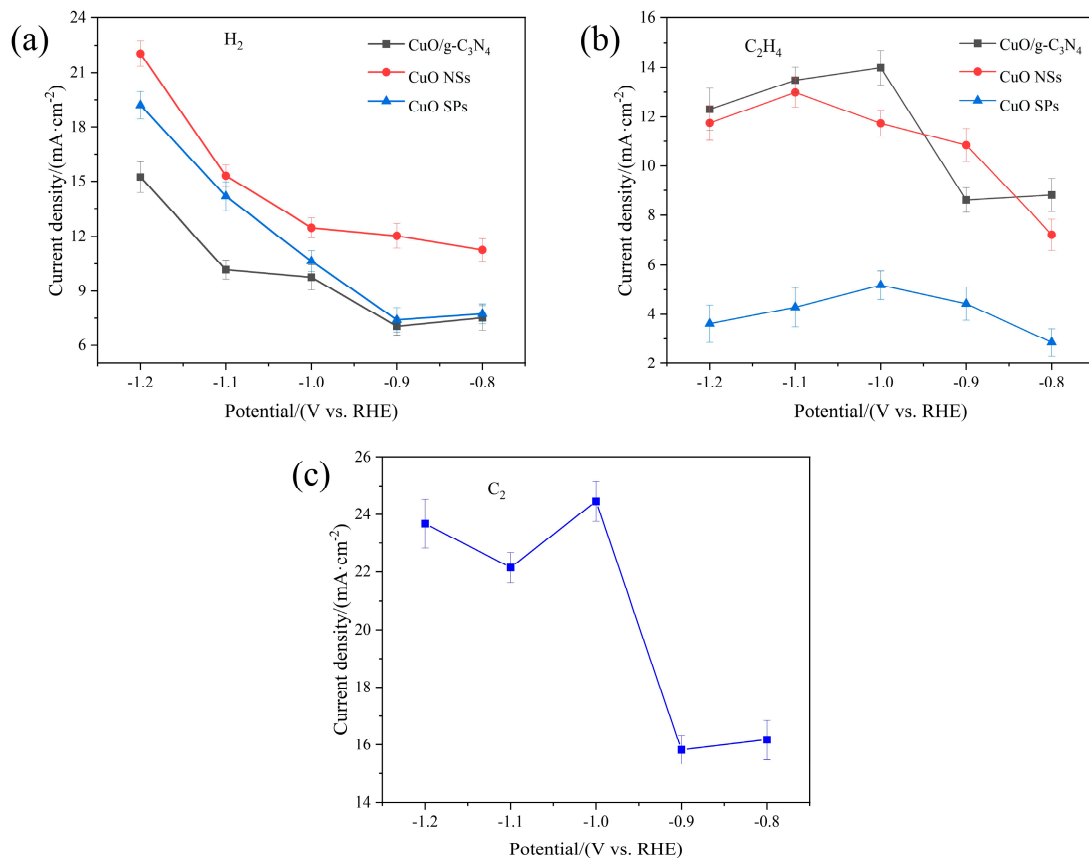

**Figure S3.** Partial current densities of the products from CO<sub>2</sub> reductions on each catalyst. (a) H<sub>2</sub>, (b) C<sub>2</sub>H<sub>4</sub> and (c) C<sub>2</sub> for CuO/g-C<sub>3</sub>N<sub>4</sub>.

**Table S2.** Comparison of various catalysts for CO<sub>2</sub> electroreduction.

| Catalyst                            | Product                       | Electrolyte             | Potential/(V vs. RHE) | Faradaic efficiency/% | Current density/(mA · cm <sup>-2</sup> ) | Ref.      |
|-------------------------------------|-------------------------------|-------------------------|-----------------------|-----------------------|------------------------------------------|-----------|
| CuO/g-C <sub>3</sub> N <sub>4</sub> | C <sub>2</sub> H <sub>4</sub> | 0.1 M KHCO <sub>3</sub> | -1.00                 | 37.0                  | 14.0                                     | This work |
|                                     | C <sub>2</sub>                | 0.1 M KHCO <sub>3</sub> | -1.00                 | 64.7                  | 24.5                                     |           |
| Cu NDs                              | C <sub>2</sub> H <sub>4</sub> | 0.1 M KHCO <sub>3</sub> | -1.20                 | 22.3                  | 10.0                                     | [1]       |
| HPR-LDH                             | C <sub>2</sub> H <sub>4</sub> | 0.1 M KHCO <sub>3</sub> | -1.10                 | 36.0                  | 4.2                                      | [2]       |
| Cu <sub>2</sub> O thin films        | C <sub>2</sub> H <sub>4</sub> | 0.1 M KHCO <sub>3</sub> | -0.98                 | 31.0                  | 13.3                                     | [3]       |
| CuZn alloy                          | C <sub>2</sub> H <sub>4</sub> | 0.1 M KHCO <sub>3</sub> | -1.10                 | 33.3                  | 2.0                                      | [4]       |
| Prism-Cu                            | C <sub>2</sub> H <sub>4</sub> | 0.1 M KHCO <sub>3</sub> | -1.15                 | 30.0                  | 12.0                                     | [5]       |

|                                        |                                  |                            |       |      |      |      |
|----------------------------------------|----------------------------------|----------------------------|-------|------|------|------|
| Cu <sub>2</sub> O-derived<br>Cu        | C <sub>2</sub> H <sub>4</sub>    | 0.1 M<br>KHCO <sub>3</sub> | -0.98 | 43.0 | 13.3 | [3]  |
| CuS <sub>2</sub> -Cu-V                 | C <sub>2</sub> & C <sub>2+</sub> | 0.1 M<br>KHCO <sub>3</sub> | -0.95 | 23.0 | 7.3  | [6]  |
| Cu <sub>2</sub> (OH)Cl                 | C <sub>2</sub> & C <sub>2+</sub> | 0.1 M<br>KHCO <sub>3</sub> | -1.20 | 52.0 | 31.0 | [7]  |
| Cu NPs                                 | C <sub>2</sub> & C <sub>2+</sub> | 0.1 M<br>KHCO <sub>3</sub> | -0.75 | 50.0 | 10.0 | [8]  |
| Cu(Ag-20) <sub>20</sub>                | C <sub>2</sub> & C <sub>2+</sub> | 0.1 M<br>KHCO <sub>3</sub> | -1.10 | 31.4 | 7.9  | [9]  |
| Cu foil                                | C <sub>2</sub> & C <sub>2+</sub> | 0.1 M<br>KHCO <sub>3</sub> | -1.00 | 60.0 | 40.0 | [10] |
| Cu <sub>2</sub> O-derived<br>particles | C <sub>2</sub> & C <sub>2+</sub> | 0.1 M<br>KHCO <sub>3</sub> | -1.18 | 54.4 | 31.2 | [11] |
| CuX (X = Cl,<br>Br, or I)              | C <sub>2</sub> & C <sub>2+</sub> | 0.1 M<br>KHCO <sub>3</sub> | -1.11 | 72.6 | 47.2 | [12] |

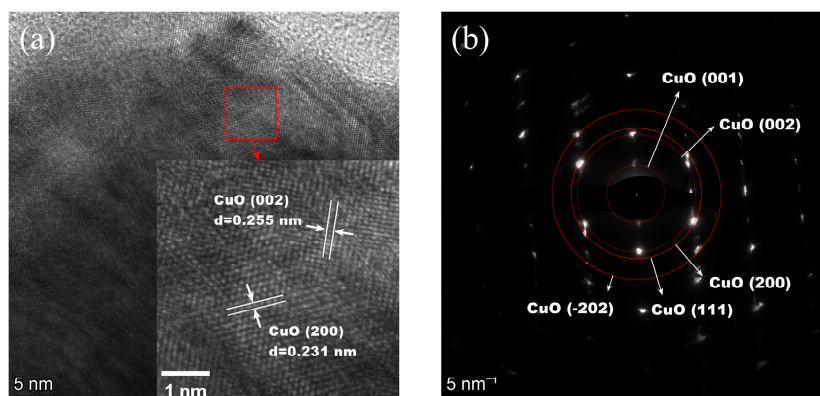

**Figure S4.** (a) HRTEM and (b) SAED patterns of CuO/g-C<sub>3</sub>N<sub>4</sub>.

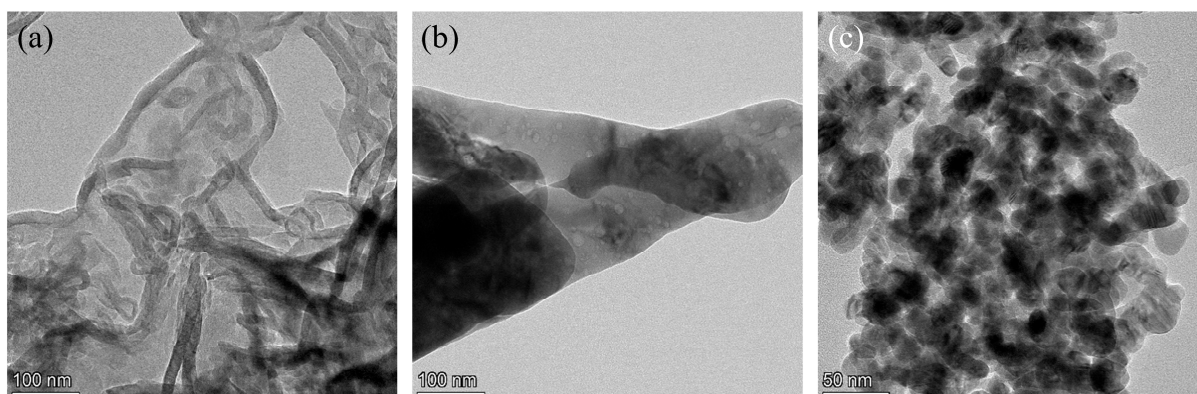

**Figure S5.** TEM images of (a) g-C<sub>3</sub>N<sub>4</sub>, (b) CuO NSs, (c) CuO SPs.

## References

1. Wu, M.; Zhu, C.; Wang, K.; Li, G.; Dong, X.; Song, Y.; Xue, J.; Chen, W.; Wei, W.; Sun, Y. Promotion of CO<sub>2</sub> Electrochemical Reduction via Cu Nanodendrites. *ACS Appl. Mater. Interfaces* **2020**, *12*, 11562–11569, <https://doi.org/10.1021/acsami.9b21153>.
2. Altaf, N.; Liang, S.; Huang, L.; Wang, Q. Electro-derived Cu-Cu<sub>2</sub>O nanocluster from LDH for stable and selective C<sub>2</sub> hydrocarbons production from CO<sub>2</sub> electrochemical reduction. *J. Energy Chem.* **2019**, *48*, 169–180, <https://doi.org/10.1016/j.jechem.2019.12.013>.
3. Handoko, A.D.; Ong, C.W.; Huang, Y.; Lee, Z.G.; Lin, L.; Panetti, G.B.; Yeo, B.S. Mechanistic insights into the selective electroreduction of carbon dioxide to ethylene on Cu<sub>2</sub>O-derived copper catalysts. *J. Phys. Chem. C* **2016**, *120*, 20058–20067.
4. Feng, Y.; Li, Z.; Liu, H.; Dong, C.; Wang, J.; Kulinich, S.A.; Du, X.-W. Laser-Prepared CuZn Alloy Catalyst for Selective Electrochemical Reduction of CO<sub>2</sub> to Ethylene. *Langmuir* **2018**, *34*, 13544–13549, <https://doi.org/10.1021/acs.langmuir.8b02837>.
5. Jeon, H.S.; Kunze, S.; Scholten, F.; Roldan Cuenya, B. Prism-shaped Cu nanocatalysts for electrochemical CO<sub>2</sub> reduction to ethylene. *ACS Catal.* **2018**, *8*, 531–535.
6. Zhuang, T.-T.; Liang, Z.-Q.; Seifitokaldani, A.; Li, Y.; De Luna, P.; Burdyny, T.; Che, F.; Meng, F.; Min, Y.; Quintero-Bermudez, R.; et al. Steering post-C–C coupling selectivity enables high efficiency electroreduction of carbon dioxide to multi-carbon alcohols. *Nat. Catal.* **2018**, *1*, 421–428, <https://doi.org/10.1038/s41929-018-0084-7>.
7. De Luna, P.; Quintero-Bermudez, R.; Dinh, C.-T.; Ross, M.B.; Bushuyev, O.S.; Todorović, P.; Regier, T.; Kelley, S.O.; Yang, P.; Sargent, E.H. Catalyst electro-redeposition controls morphology and oxidation state for selective carbon dioxide reduction. *Nat. Catal.* **2018**, *1*, 103–110.
8. Kim, D.; Kley, C.S.; Li, Y.; Yang, P. Copper nanoparticle ensembles for selective electroreduction of CO<sub>2</sub> to C<sub>2</sub>–C<sub>3</sub> products. *Proc. Natl. Acad. Sci. USA* **2017**, *114*, 10560–10565.
9. Ting LR, L.; Pique, O.; Lim, S.Y.; Tanhaei, M.; Calle-Vallejo, F.; Yeo, B.S. Enhancing CO<sub>2</sub> electroreduction to ethanol on copper–silver composites by opening an alternative catalytic pathway. *ACS Catal.* **2020**, *10*, 4059–4069.
10. Jiang, K.; Sandberg, R.B.; Akey, A.J.; Liu, X.; Bell, D.C.; Nørskov, J.K.; Chan, K.; Wang, H. Metal ion cycling of Cu foil for selective C–C coupling in electrochemical CO<sub>2</sub> reduction. *Nat. Catal.* **2018**, *1*, 111–119.
11. Torelli, D.A.; Francis, S.A.; Crompton, J.C.; Javier, A.; Thompson, J.R.; Brunschwig, B.S.; Soriaga, M.P.; Lewis, N.S. Nickel–gallium-catalyzed electrochemical reduction of CO<sub>2</sub> to highly reduced products at low overpotentials. *ACS Catal.* **2016**, *6*, 2100–2104.
12. Kim, T.; Palmore, G.T.R. A scalable method for preparing Cu electrocatalysts that convert CO<sub>2</sub> into C<sub>2</sub>+ products. *Nat. Commun.* **2020**, *11*, 1–11.
